# Supplementary material for: Functional Analyses of the Bacillus velezensis HMB26553 Genome Provide Evidence That Its Genes Are Potentially Related to the Promotion of Plant Growth and Prevention of Cotton Rhizoctonia Damping-Off
Source: MDPI journal article supplement (doi:10.3390/cells12091301), 2023-05-02
Supplement: s1 [file s1]

**Functional Analyses of the *Bacillus velezensis* HMB26553  
Genome Provide Evidence That its Genes are Potentially Related to the Promotion of Plant  
Growth and Prevention of Cotton Rhizoctonia Damping-Off**

**Table S1 Characterization of mobile element prophages in HMB26553 genome and plasmid**

| Location   | Ph No. | Ph Start | Ph End  | Length (bp) | CDS No. | Possible Phage                     | GC(%) |
|------------|--------|----------|---------|-------------|---------|------------------------------------|-------|
| Chromosome | Ph01   | 5772     | 88890   | 83119       | 146     | Bacillus_phage_SPBc2_NC_001884     | 35.5  |
| Chromosome | Ph02   | 898486   | 946156  | 47671       | 64      | Bacillus_phage_SPBc2_NC_001884     | 48.81 |
| Chromosome | Ph03   | 1288332  | 1320760 | 32429       | 45      | Streptococcus_phage_EJ-1_NC_005294 | 46.86 |
| Chromosome | Ph04   | 2807911  | 2853628 | 45718       | 77      | Listeria_phage_B054_NC_009813      | 43.37 |
| Chromosome | Ph05   | 3110944  | 3187878 | 76935       | 101     | Bacillus_phage_SPBc2_NC_001884     | 47.44 |

**Table S2 Characterization of mobile element gene islands in HMB26553 genome and plasmid**

| Location   | GI No. | Island Start | Island End | Length(bp) | CDS No. | GC(%) |
|------------|--------|--------------|------------|------------|---------|-------|
| Chromosome | GI01   | 2181453      | 2211626    | 30173      | 34      | 36.10 |
| Chromosome | GI02   | 2808272      | 2828726    | 20454      | 28      | 42.11 |
| Chromosome | GI03   | 3114033      | 3189050    | 75017      | 99      | 47.64 |
| Chromosome | GI04   | 874326       | 945805     | 71479      | 89      | 48.66 |
| plaBV1     | GI05   | 17275        | 20260      | 2985       | 8       | 37.82 |

**Table S3 Characterization of mobile element Crisprs in HMB26553 genome and plasmid**

| Location   | Crisprs_ No. | Crisprs_start | Crisprs_end | DR_number | DR_Average_length | SPA_Average_length |
|------------|--------------|---------------|-------------|-----------|-------------------|--------------------|
| Chromosome | CRISPR1      | 454669        | 454942      | 5         | 34                | 26                 |
| Chromosome | CRISPR2      | 754240        | 754886      | 9         | 45                | 30                 |
| Chromosome | CRISPR3      | 1307821       | 1308584     | 10        | 35                | 46                 |
| Chromosome | CRISPR4      | 1352905       | 1352986     | 2         | 28                | 26                 |
| Chromosome | CRISPR5      | 1355208       | 1355572     | 6         | 23                | 45                 |
| Chromosome | CRISPR6      | 2774436       | 2774797     | 5         | 32                | 50                 |
| Chromosome | CRISPR7      | 3727004       | 3727254     | 4         | 26                | 49                 |

**Table S4** The genome of GenBank accession No used in this study.

| strains                           | GenBank accession No. | strains                               | GenBank accession No. |
|-----------------------------------|-----------------------|---------------------------------------|-----------------------|
| HMB26553                          | CP097467              | <i>B. vanillea</i> XY18               | GCF_000966575         |
| <i>B. stercoris</i> D7XPN1        | GCF_000738015         | <i>B. methylotrophicus</i> KACC 13105 | GCF_000960265         |
| <i>B. velezensis</i> FZB42        | GCF_000015785         | <i>B. velezensis</i> NRRL B-41580     | GCF_001461825         |
| <i>B. subtilis</i> NCIB 3610      | GCF_000186085         | <i>B. nakamurai</i> NRRL B-41091      | GCF_001584325         |
| <i>B. amyloliquefaciens</i> DSM 7 | GCF_000196735         | <i>B. cabrialesii</i> TE3             | GCF_004124315         |
| <i>B. vallismortis</i> DV1-F-3    | GCF_000245315         | <i>B. rugosus</i> SPB7                | GCF_011745685         |
| <i>B. siamensis</i> KCTC 13613    | GCF_000262045         | <i>B. tequilensis</i> NCTC13306       | GCF_900445435         |
| <i>B. subtilis</i> ATCC 6051      | GCF_006088795         |                                       |                       |

**Table S5.** Genes involved in the modulation of plant hormones.

| Pathway                                   | Gene        | Product                                          | Locus Tag                        |
|-------------------------------------------|-------------|--------------------------------------------------|----------------------------------|
| IAA production (L-tryptophan pathway)     | <i>trpA</i> | tryptophan synthase subunit alpha TrpA           | gene2390                         |
|                                           | <i>trpB</i> | tryptophan synthase subunit beta TrpB            | gene2391                         |
|                                           | <i>trpC</i> | indole-3-glycerol phosphate synthase TrpC        | gene2393                         |
|                                           | <i>trpD</i> | anthranilate phosphoribosyltransferase           | gene2394                         |
|                                           | <i>trpE</i> | anthranilate synthase component I                | gene2395                         |
|                                           | <i>trpS</i> | Tryptophan-tRNA ligase                           | gene1315                         |
| IAA production IPA pathway                | <i>dhaS</i> | aldehyde dehydrogenase DhaS                      | gene2186                         |
|                                           | <i>dha</i>  | aldehyde dehydrogenase                           | gene3130 gene4357                |
|                                           | <i>ywkB</i> | auxin efflux carrier                             | gene4057                         |
| ACC catabolism (ethylene)                 | <i>acdA</i> | acyl-CoA dehydrogenase AcdA                      | gene0493<br>gene2060<br>gene2564 |
| cytokinin biosynthesis and transformation | <i>miaA</i> | (adenosine(37)-N6)-dimethylallyltransferase MiaA | gene1971                         |
| ammonia production                        | <i>nadE</i> | ammonia-dependent NAD(+) synthetase              | gene0328                         |

**Table S6.** Genes involved in iron transport and siderophore production.

| Pathway               | Gene         | Product                                                     | Locus Tag |
|-----------------------|--------------|-------------------------------------------------------------|-----------|
| Iron(III) transport   | <i>fbpA</i>  | fur-regulated basic protein FbpA                            | gene1537  |
|                       | <i>fetB</i>  | iron export ABC transporter permease subunit FetB           | gene1420  |
|                       | <i>feuC</i>  | Iron-uptake system permease protein FeuC                    | gene0202  |
|                       | <i>feuB</i>  | ferrichrome ABC transporter permease                        | gene0203  |
|                       | ND           | iron-uptake system-binding protein                          | gene0204  |
| Iron(II) transport    | <i>fecCD</i> | iron complex transport system permease protein              | gene0406  |
|                       | <i>fecCD</i> | iron chelate uptake ABC transporter family permease subunit | gene0407  |
|                       | ND           | iron ABC transporter ATP-binding protein                    | gene0408  |
|                       | ND           | iron ABC transporter substrate-binding protein              | gene0409  |
|                       | ND           | iron-dicitrate ABC transporter substrate-binding protein    | gene1219  |
| Siderophore transport | <i>rhbE</i>  | rhizobactin siderophore biosynthesis protein                | gene1168  |
|                       | ND           | 2,3-dihydroxybenzoate-AMP ligase                            | gene3487  |
|                       | ND           | 2,3-dihydro-2,3-dihydroxybenzoate dehydrogenase             | gene3489  |
|                       | <i>yusV</i>  | iron-enterobactin transporter ATP-binding protein           | gene3599  |
|                       | <i>yfiY</i>  | iron-hydroxamate ABC transporter substrate-binding protein  | gene4230  |

Key: ND—not determined.

**Table S7.** Genes involved in extracellular enzymes.

| Pathway  | Gene        | Product                                             | Locus Tag |
|----------|-------------|-----------------------------------------------------|-----------|
| protease | <i>yabG</i> | sporulation-specific protease YabG                  | gene0056  |
|          | <i>ftsH</i> | ATP-dependent zinc metalloprotease FtsH             | gene0085  |
|          | <i>clpC</i> | ATP-dependent Clp protease ATP-binding subunit ClpC | gene0117  |
|          | <i>ydcA</i> | rhomboid family intramembrane serine protease YdcA  | gene0504  |
|          | <i>ydiL</i> | CAAX prenyl protease YdiL                           | gene0672  |
|          | <i>ND</i>   | CAAX protease                                       | gene0787  |
|          | <i>ywpE</i> | cysteine protease YwpE                              | gene0822  |
|          | <i>ND</i>   | serine protease                                     | gene0910  |
|          | <i>clpB</i> | Clp protease ClpB                                   | gene1022  |
|          | <i>yhfN</i> | metalloprotease YhfN                                | gene1215  |
|          | <i>ND</i>   | Alkaline protease                                   | gene1216  |
|          | <i>yjaZ</i> | Zn-dependent protease YjaZ                          | gene1308  |
|          | <i>xkdF</i> | phage serine protease XkdF                          | gene1453  |
|          | <i>ND</i>   | serine protease                                     | gene1491  |
|          | <i>ND</i>   | serine protease                                     | gene1524  |
|          | <i>htpX</i> | protease HtpX                                       | gene1549  |
|          | <i>clpX</i> | Clp protease ClpX                                   | gene1575  |
|          | <i>ampS</i> | thermophilic metalloprotease (M29) AmpS             | gene1653  |
|          | <i>nprE</i> | neutral protease                                    | gene1692  |
|          | <i>ylbL</i> | Lon-like protease YlbL                              | gene1727  |
|          | <i>ND</i>   | RP-I protease                                       | gene1752  |
|          | <i>clpQ</i> | ATP-dependent protease subunit ClpQ                 | gene1842  |
|          | <i>hslU</i> | ATP-dependent protease ATP-binding subunit HslU     | gene1843  |
|          | <i>rseP</i> | RIP metalloprotease RseP                            | gene1884  |
|          | <i>ymxG</i> | zinc protease YmxG                                  | gene1898  |
|          | <i>tepA</i> | Clp protease TepA                                   | gene1906  |
|          | <i>ymfF</i> | metalloprotease YmfF                                | gene1913  |
|          | <i>ymfH</i> | zinc protease YmfH                                  | gene1914  |
|          | <i>aprX</i> | alkaline serine protease AprX                       | gene1961  |
|          | <i>ctpA</i> | carboxy-terminal processing protease CtpA           | gene2223  |
|          | <i>prsW</i> | protease PrsW                                       | gene2422  |
|          | <i>yphD</i> | caax amino terminal protease                        | gene2429  |
|          | <i>ND</i>   | sporulation factor IV B protease                    | gene2581  |
|          | <i>yqeZ</i> | CLP_protease YqeZ                                   | gene2703  |
|          | <i>gpr</i>  | germination protease gpr                            | gene2718  |
|          | <i>yrrO</i> | protease YrrO                                       | gene2807  |
|          | <i>yrrN</i> | protease YrrN                                       | gene2808  |
|          | <i>Prp</i>  | cysteine protease Prp                               | gene2869  |
|          | <i>La</i>   | Lon protease 1                                      | gene2897  |
|          | <i>lonB</i> | ATP-dependent protease LonB                         | gene2898  |
|          | <i>clpX</i> | ATP-dependent Clp protease ATP-binding subunit ClpX | gene2899  |
|          | <i>sppA</i> | CLP_protease SppA                                   | gene3113  |
|          | <i>yraA</i> | cysteine protease YraA                              | gene3138  |
|          | <i>ND</i>   | ATP-dependent Clp protease proteolytic subunit      | gene3322  |
|          | <i>pfpI</i> | protease PfpI                                       | gene3401  |
|          | <i>yugP</i> | neutral zinc metalloproteinase YugP                 | gene3413  |
|          | <i>htrB</i> | serine protease HtrB                                | gene3604  |
|          | <i>ND</i>   | reprolysin (M12B) family zinc metalloprotease       | gene3662  |
|          | <i>clpP</i> | ATP-dependent Clp protease proteolytic subunit clpP | gene3782  |
|          | <i>minJ</i> | serine protease MinJ                                | gene3853  |
|          | <i>ctpB</i> | carboxy-terminal processing protease CtpB           | gene3855  |
|          | <i>ywhC</i> | zinc metalloprotease YwhC                           | gene4103  |

|           |              |                                             |          |
|-----------|--------------|---------------------------------------------|----------|
|           | <i>vpr</i>   | minor extracellular protease vpr            | gene4172 |
|           | <i>yjfC</i>  | Zn-dependent protease YjfC                  | gene4200 |
|           | <i>epr</i>   | minor extracellular protease Epr            | gene4204 |
|           | <i>htpX</i>  | protease HtpX                               | gene4364 |
|           | <i>yyx.A</i> | serine protease                             | gene4405 |
|           | <i>epr</i>   | minor extracellular protease Epr            | gene4456 |
|           | <i>yyaK</i>  | caax amino terminal protease                | gene4462 |
|           | <i>yyaC</i>  | spore protease YyaC                         | gene4477 |
|           |              |                                             | gene0301 |
|           |              |                                             | gene0320 |
| amylase   | <i>amyA</i>  | alpha-glucosidase                           | gene3411 |
|           |              |                                             | gene3784 |
|           |              |                                             | gene3790 |
|           | <i>ND</i>    | alpha-phosphotrehalase                      | gene0843 |
|           | <i>ND</i>    | arabinogalactan endo-1,4-beta-galactosidase | gene1397 |
|           | <i>ND</i>    | endo-1,4-beta-glucanase                     | gene2091 |
|           | <i>bglC</i>  | aryl-phospho-beta-D-glucosidase BglC        | gene0354 |
|           | <i>bglA</i>  | aryl-phospho-beta-D-glucosidase BglA        | gene2221 |
| cellulase | <i>ND</i>    | 6-phospho-beta-galactosidase                | gene1403 |
|           | <i>ND</i>    | glycosyl hydrolase                          | gene2219 |
|           | <i>celF</i>  | 6-phospho-beta-glucosidase CelF             | gene4220 |
|           | <i>bglA</i>  | 6-phospho-beta-glucosidase BglA             | gene4236 |

**Table S8.** Genes involved in motility.

| Pathway  | Gene         | Product                                                       | Locus Tag |
|----------|--------------|---------------------------------------------------------------|-----------|
|          | <i>swrC</i>  | swarming motility protein SwrC                                | gene0745  |
|          | <i>pilT</i>  | twitching motility protein PilT                               | gene0749  |
|          | <i>yjfB</i>  | putative motility protein YjfB                                | gene1411  |
|          | <i>motB</i>  | flagellar motor protein MotB                                  | gene1572  |
|          | <i>motA</i>  | flagellar motor protein MotA                                  | gene1573  |
|          | <i>flgB</i>  | flagellar biosynthesis protein FlgB                           | gene1845  |
|          | <i>flgC</i>  | flagellar basal body rod protein FlgC                         | gene1846  |
|          | <i>fliE</i>  | flagellar hook-basal body complex protein FliE                | gene1847  |
|          | <i>fliF</i>  | flagellar M-ring protein FliF                                 | gene1848  |
|          | <i>fliG</i>  | flagellar motor switch protein FliG                           | gene1849  |
|          | <i>fliH</i>  | flagellar assembly protein FliH                               | gene1850  |
|          | <i>ND</i>    | Flagellum-specific ATP synthase                               | gene1851  |
|          | <i>fliJ</i>  | flagellar biosynthesis chaperone FliJ                         | gene1852  |
|          | <i>fliK</i>  | flagellar hook-length control protein FliK                    | gene1854  |
|          | <i>flgD</i>  | flagellar basal body rod modification protein FlgD            | gene1855  |
| Motility | <i>flgG</i>  | flagellar basal body rod protein FlgG                         | gene1856  |
|          | <i>fliL</i>  | flagellar basal body-associated protein FliL                  | gene1858  |
|          | <i>fliM</i>  | flagellar motor switch protein FliM                           | gene1859  |
|          | <i>fliY</i>  | flagellar motor switch phosphatase FliY                       | gene1860  |
|          | <i>fliZ</i>  | flagellar biosynthesis protein FliZ                           | gene1862  |
|          | <i>fliP</i>  | flagellar biosynthetic protein FliP                           | gene1863  |
|          | <i>fliQ</i>  | flagellar export apparatus protein FliQ                       | gene1864  |
|          | <i>fliR</i>  | flagellar biosynthesis protein FliR                           | gene1865  |
|          | <i>flhB</i>  | flagellar biosynthesis protein FlhB                           | gene1865  |
|          | <i>flhA</i>  | flagellar biosynthesis protein FlhA                           | gene1867  |
|          | <i>flhF</i>  | flagellar biosynthesis regulator FlhF                         | gene1868  |
|          | <i>swrB</i>  | swarming motility protein SwrB                                | gene1876  |
|          | <i>ypfA</i>  | increasing levels of c-di-GMP lead to decreased motility YpfA | gene2419  |
|          | <i>swrAA</i> | swarming motility protein SwrAA                               | gene3854  |
|          | <i>fliT</i>  | flagellar protein FliT                                        | gene3865  |

|             |                                               |          |
|-------------|-----------------------------------------------|----------|
| <i>fliS</i> | flagellar protein FliS                        | gene3866 |
| <i>fliD</i> | flagellar hook-associated protein             | gene3867 |
| <i>fliC</i> | Flagellin fliC                                | gene3868 |
| <i>fliW</i> | flagellar assembly protein FliW               | gene3870 |
| <i>flgL</i> | flagellar hook-associated protein FlgL        | gene3872 |
| <i>flgK</i> | flagellar hook-associated protein FlgK        | gene3873 |
| <i>flgN</i> | flagellar protein FlgN                        | gene3874 |
| <i>flgM</i> | flagellar biosynthesis anti-sigma factor FlgM | gene3875 |
| <i>flhP</i> | flagellar hook-basal body protein FlhP        | gene3985 |
| <i>flhO</i> | flagellar basal body rod protein subunit C    | gene3986 |

**Table S9.** Genes involved in biofilm formation.

| Pathway            | Gene        | Product                                                                          | Locus Tag |
|--------------------|-------------|----------------------------------------------------------------------------------|-----------|
| Biofilm formation  | <i>efp</i>  | elongation Factor P                                                              | gene2604  |
|                    | <i>tasA</i> | camelysin metallo-endopeptidase tasA                                             | gene2620  |
|                    | <i>hfq</i>  | RNA chaperone Hfq                                                                | gene1972  |
|                    | <i>crp</i>  | Crp/Fnr family transcriptional regulator                                         | gene1522  |
|                    |             |                                                                                  | gene4085  |
|                    | <i>wzd</i>  | Auxiliary protein for polysaccharide export and chain length determination       | gene3972  |
|                    | <i>wze</i>  | Autophosphorylating tyrosine-protein kinase                                      | gene3757  |
|                    | <i>wzy</i>  | Repeat unit polymerase                                                           | gene3458  |
|                    | <i>wzx</i>  | Repeat unit transporter                                                          | gene3184  |
|                    | <i>well</i> | Glycosyltransferase                                                              | gene3753  |
| EPS                | <i>welH</i> | Glycosyltransferase                                                              | gene3887  |
|                    | <i>welG</i> | Glycosyltransferase                                                              | gene3155  |
|                    | <i>welF</i> | Glycosyltransferase                                                              | gene2370  |
|                    | <i>welE</i> | Undecaprenyl-phosphate galactose phosphotransferase; priming glycosyltransferase | gene3893  |
|                    | <i>rmlA</i> | dTDP-glucose pyrophosphorylase                                                   | gene4147  |
|                    | <i>rmlC</i> | dTDP-4-dehydro-rhamnose-3,5-epimerase                                            | gene4144  |
|                    | <i>rmlB</i> | dTDP-d-glucose-4,6-dehydratase                                                   | gene4146  |
|                    | <i>wzr</i>  | Transcriptional regulator of polysaccharide biosynthesis                         | gene3897  |
|                    | <i>wzb</i>  | Phosphotyrosine protein phosphatase                                              | gene3970  |
|                    | <i>liaG</i> | Adhesion LiaG                                                                    | gene3618  |
| Adhesin            | <i>yvlB</i> | Adhesion YvlB                                                                    | gene3835  |
|                    | <i>liaG</i> | Adhesion liaG                                                                    | gene4141  |
|                    | <i>bcsB</i> | cellulose synthase bcsB                                                          | gene0458  |
|                    |             |                                                                                  | gene1869  |
| cellulose synthase | <i>BcsQ</i> | cellulose synthase bcsQ                                                          | gene2873  |
|                    |             |                                                                                  | gene3971  |
|                    |             |                                                                                  | gene4479  |

**Table S10.** Genes involved in nitrogen fixation and nitrogen metabolism.

| Pathway               | Gene             | Product                                        | Locus Tag |
|-----------------------|------------------|------------------------------------------------|-----------|
| Nitrogen fixation     | <i>nif3-like</i> | nitrogen fixation protein Nif 3-like           | gene2679  |
|                       | <i>gltP</i>      | glutamate/aspartate: proton symporter GltP     | gene1208  |
| Nitrogen metabolism   | <i>gltX</i>      | Glutamate-tRNA ligase                          | gene0268  |
|                       | <i>glnR</i>      | transcriptional repressor GlnR                 | gene0123  |
|                       | <i>glnA</i>      | type I glutamate-ammonia ligase/glutamine      | gene1985  |
|                       | <i>glnH</i>      | ABC transporter substrate-binding protein GlnH | gene1986  |
|                       | <i>glnH</i>      |                                                | gene2818  |
| Nitrogen regulation   | <i>nadR</i>      | transcription repressor NadR                   | gene2863  |
| Dissimilatory nitrate | <i>nirB</i>      | nitrite reductase (NADH) large subunit         | gene0346  |
|                       | <i>nirD</i>      | nitrate reductase (NADH) small subunit         | gene0345  |

|              |             |                                                  |          |
|--------------|-------------|--------------------------------------------------|----------|
| reduction    | <i>narI</i> | respiratory nitrate reductase subunit gamma      | gene4078 |
|              | <i>narH</i> | nitrate reductase subunit beta/nitrate reductase | gene4080 |
|              | <i>narJ</i> | molybdenum cofactor assembly chaperone           | gene4079 |
|              | <i>nar</i>  | nitrate reductase subunit alpha                  | gene4081 |
|              | <i>nark</i> | nitrate transporter                              | gene0349 |
| Ammonia      | <i>gltX</i> | glutamate-tRNA ligase                            | gene0123 |
| assimilation | <i>gltP</i> | glutamate/aspartate: proton symporter GltP       | gene1208 |
|              |             |                                                  | gene0268 |

**Table S11.** Genes involved in phosphate solubilization and transport.

| Pathway                     | Gene        | Product                                            | Locus Tag |
|-----------------------------|-------------|----------------------------------------------------|-----------|
| Degradation of phosphonates | <i>phnC</i> | phosphonate transport system ATP-binding           | gene2549  |
|                             | <i>ispH</i> | 4-hydroxy-3-methylbut-2-enyl diphosphate reductase | gene2678  |
|                             | <i>pstA</i> | phosphate ABC transporter, permease protein PstA   | gene2658  |
|                             | <i>pstC</i> | phosphate ABC transporter permease subunit PstC    | gene2659  |
|                             | <i>pstS</i> | phosphate transport system permease protein        | gene2660  |
|                             | <i>pstB</i> | phosphate import ATP-binding protein pstB          | gene3698  |
|                             |             |                                                    | gene2656  |
|                             |             |                                                    | gene2657  |
|                             | <i>gltP</i> | proton glutamate symport protein                   | gene1208  |
|                             | <i>phoH</i> | phosphate starvation protein PhoH                  | gene0268  |
|                             |             |                                                    | gene2698  |

**Table S12.** Genes involved in sulfur metabolism.

| Pathway           | Gene        | Product                                   | Locus Tag         |
|-------------------|-------------|-------------------------------------------|-------------------|
| Sulfate transport | <i>cysC</i> | adenylyl-sulfate kinase                   | gene1784          |
|                   | <i>sat</i>  | sulfate adenylyltransferase               | gene1783          |
|                   | <i>cysT</i> | sulfate transport system permease protein | gene0767          |
|                   | <i>cysK</i> | cysteine synthase A                       | gene3176          |
|                   | <i>cysS</i> | cysteine--tRNA ligase                     | gene0126          |
|                   | <i>sulP</i> | sulfate permease                          | gene0199 gene1782 |
|                   |             |                                           | gene3794          |

**Table S13.** Genes involved in chemotaxis.

| Pathway    | Gene        | Product                                           | Locus Tag |
|------------|-------------|---------------------------------------------------|-----------|
| Chemotaxis | <i>cheV</i> | chemotaxis protein CheV                           | gene1613  |
|            | <i>ND</i>   | chemotaxis response regulator                     | gene1870  |
|            | <i>cheA</i> | chemotactic two-component sensor histidine kinase | gene1871  |
|            | <i>cheW</i> | purine-binding hemotaxis protein CheW             | gene1872  |
|            | <i>cheC</i> | CheY-P-specific phosphatase CheC                  | gene1873  |
|            | <i>ND</i>   | chemoreceptor glutamine deamidase CheD            | gene1874  |
|            | <i>ND</i>   | chemotaxis protein                                | gene0798  |
|            | <i>ND</i>   | chemotaxis protein                                | gene1606  |
|            | <i>che</i>  | methyl-accepting chemotaxis protein               | gene3402  |
|            |             |                                                   | gene3403  |
|            |             |                                                   | gene3404  |
|            |             |                                                   | gene3405  |
|            |             |                                                   | gene1224  |
|            |             |                                                   |           |
